# **The urinary microbiome associated with bladder cancer**

**Viljemka Bučević Popović<sup>a</sup>, Marijan Šitum<sup>b</sup>, Cheryl-Emiliane T. Chow<sup>c</sup>, Luisa S. Chan<sup>c</sup>,  
Blanka Roje<sup>d</sup>, Janoš Terzić<sup>d,\*</sup>**

<sup>a</sup>University of Split, Faculty of Science, Department of Chemistry, Split, Croatia

<sup>b</sup>University Hospital Split, Department of Urology, Split, Croatia

<sup>c</sup>Second Genome Inc., San Francisco, California, USA

<sup>d</sup>University of Split, School of Medicine, Department of Immunology, Split, Croatia

\*Corresponding author: University of Split, School of Medicine, Šoltanska 2, 21000 Split, Croatia. Tel: +385 21 557944; Fax: +385 21 557880.

E-mail address: [jterzic@mefst.hr](mailto:jterzic@mefst.hr)

1 Recent findings suggest that microorganisms inhabiting the human body can influence the  
2 development of cancer, but the role of microorganisms in bladder cancer pathogenesis has not  
3 been explored yet. The aim of this study was to characterize and compare the urinary  
4 microbiome of bladder cancer patients with those of healthy controls. Bacterial communities  
5 present in urine specimens collected from male patients diagnosed with primary or recurrent,  
6 non-muscle invasive bladder cancers, and from healthy, age-matched individuals were  
7 analysed using 16S Illumina MiSeq sequencing. Our result show that the most abundant  
8 phylum in both groups was *Firmicutes*, followed by *Actinobacteria*, *Bacteroidetes* and  
9 *Proteobacteria*. While microbial diversity and overall microbiome composition were not  
10 significantly different between bladder cancer and healthy samples, we identified specific  
11 operational taxonomic units (OTUs) that were significantly more abundant ( $p < 0.05$ ) in either  
12 type of samples. Among those that were significantly enriched in the bladder cancer group,  
13 we identified an OTU belonging to genus *Fusobacterium*, a possible protumorigenic  
14 pathogen. Three OTUs more abundant in healthy urines were from genera *Veillonella*,  
15 *Streptococcus* and *Corynebacterium*. Detected microbiome changes suggest that microbiome  
16 may be a factor in bladder cancer pathology, and the clinical implications of reported results  
17 remain to be explored.

# 1     **Introduction**

2     Bladder cancer is the ninth most frequent malignant disease, with more than 160,000 deaths  
 3     per year reported globally. The risk of developing the disease increases with age, and it is  
 4     diagnosed three times more often in men than in women. Because majority of new cases are  
 5     found in people above 65 years of age due to increased life expectancy, it is anticipated that  
 6     the number of affected individuals will surge in the future<sup>1</sup>.

7             Apart from environmental and genetic risk factors, researchers have become  
 8     increasingly aware that microbes inhabiting the human body play an important role for  
 9     maintenance of health and the development of disease. Microbiome studies, fuelled by the  
 10     availability of high-throughput DNA-based techniques, have shown that perturbation in the  
 11     microbiome is associated with a number of human diseases. The vast majority of these studies  
 12     was performed on the gut, the body niche where most of commensal microorganisms reside,  
 13     and associations were found between microbiome and diseases such as inflammatory bowel  
 14     disease, multiple sclerosis, type 1 and 2 diabetes, allergies, asthma, autism, as well as cancer<sup>2</sup>.

15     The link between cancer and specific microbial agents is well known and it is estimated that  
 16     microorganisms contributes to up to 20% of human malignancies<sup>3</sup>. The most prominent  
 17     examples are *Helicobacter pylori* implicated in the development of gastric cancer, and high-  
 18     risk types of human papillomavirus in cervical cancer<sup>4</sup>. The interaction of microorganisms  
 19     and their hosts is extremely complex, and a multitude of molecular mechanisms may be  
 20     envisioned by which they influence oncogenesis, tumour progression and response to  
 21     anticancer therapy<sup>3,5-6</sup>. Bacteria can directly damage host DNA via genotoxins, such as  
 22     colibactin produced by some *E. coli* strains, or indirectly by generating reactive oxidative  
 23     species. Some pathogenic microorganisms manipulate host signalling pathways, exemplified  
 24     by Wnt/ $\beta$ -catenin pathway which is altered to support cell proliferation in many types of

25 cancers. Microbiome can also induce chronic inflammation providing a background for  
 26 tumour development or elicit immunosuppressive responses that may subvert cancer  
 27 immunosurveillance. Finally, bacterial metabolism of host derived metabolites, food  
 28 components or xenobiotics may result in harmful compounds that may promote tumorigenesis  
 29 even at distant body sites<sup>3,5</sup>.

30 Traditionally, bladder epithelium and urine have been considered sterile in healthy  
 31 individuals. This assumption was based primarily on microbiological urine cultures, best  
 32 suited for detecting aerobic, fast-growing uropathogens. The evidence has accumulated during  
 33 the last five years, that urinary tract also harbours distinct commensal microorganisms<sup>8</sup>. The  
 34 urinary microbiome reported for healthy people varies considerably due to use of different  
 35 analytical and urine collection methods. While female urinary microbiome is much better  
 36 characterized than male, it can be concluded that urinary microbiome is marked by sex- and  
 37 age-related differences as well as significant inter-individual variability<sup>9,10</sup>. Studies have  
 38 explored the changes in urinary microbiome in states such as type 2 diabetes mellitus<sup>11</sup>,  
 39 overactive bladder<sup>12,13</sup>, urinary incontinence<sup>14-16</sup>, interstitial cystitis<sup>17</sup>, neuropathic  
 40 bladder<sup>18,19</sup>, sexually transmitted infections<sup>20</sup> or chronic prostatitis/chronic pelvic pain  
 41 syndrome<sup>21,22</sup>. The urinary microbiome in urothelial bladder cancer has not been investigated,  
 42 apart from the pilot study by Xu *et al.*<sup>23</sup> that reported enrichment of *Streptococcus* sp. in some  
 43 of the cancer patients. Our study characterized the urinary microbiome of bladder cancer  
 44 patients and compared it with that of healthy controls to gain insight into the microbiome's  
 45 possible role in bladder cancer.

## 46     **Results**

### 47     **Participant characteristics and sequencing data summary**

48     A total of 36 subjects were included in the study. However, 12 samples failed to provide  
 49     sufficient DNA for sequencing and one sample did not meet sequencing quality criteria due to  
 50     low sequencing depth. Supplementary Table S1 displays characteristics of remaining 23  
 51     subjects (12 bladder cancer patients and 11 healthy controls).

52     Sequencing of urine samples plus extraction control resulted with a total of 22,341,934 raw  
 53     sequences. These were merged into 9,977,955 paired sequences, with an average read length  
 54     of 252 base pairs. Filtering for sequence quality and OTU prevalence (min. 10% of samples)  
 55     reduced the number of sequences to 9,713,510, assigned to 348 OTUs. One of the bladder  
 56     cancer samples with less than 50,000 reads was excluded from further analysis. Rarefaction  
 57     curves show that the remaining 23 samples were sequenced to a sufficient depth such that a  
 58     complete microbiome profile was likely captured for most samples (Supplementary Fig. S1).  
 59     Classification to the genus level was possible for 95% of sequence reads. A total of 10  
 60     bacterial phyla, 19 classes, 26 orders, 61 families and 107 genera were identified. Only two  
 61     OTUs were detected in the extraction control, one belonged to genus *Bacteroides* and the  
 62     other was a chloroplast from the order *Streptophyta*.

### 63     **Microbiome diversity and composition of bladder cancer and healthy urine samples**

64     Both metrics used to assess differences in microbial alpha diversity (richness and Shannon  
 65     Index) were statistically similar between cancerous and healthy samples (Fig. 1). The average  
 66     number of observed OTUs found within a sample was 182 for the bladder cancer group and  
 67     184 for healthy controls (Fig. 1a).

68 The urinary microbiome of bladder cancer patients and healthy controls at the phylum and the  
69 family level is shown in Fig. 2. The most abundant phyla included *Firmicutes*, *Actinobacteria*,  
70 *Bacteroidetes* and *Proteobacteria*. A prominent feature of urinary microbiome evidenced  
71 from these results is that there is a high degree of inter-individual variability in community  
72 composition among study participants in both bladder cancer and healthy subgroups. The  
73 microbial composition of the sample collected from one of the bladder cancer patients  
74 (AK15\_4004 in Fig. 2) was inconsistent with other urine samples; it was dominated by the  
75 family *Enterobacteriaceae* with relative abundance of 91% and it was excluded from  
76 community structure analysis.

77 No differences in the overall urinary microbiome of bladder cancer urine samples compared  
78 to healthy samples was observed as bladder cancer urine samples did not cluster in the PCoA  
79 (Fig. 3). A PERMANOVA analysis was also performed to determine if there is a significant  
80 association between microbiome composition and other tested variables such as malignancy,  
81 cancer type or patient age. Among those, variations in the urine microbiome were  
82 significantly associated only with age across all samples ( $p = 0.008$ ).

### 83 **Community structure reveals differently abundant OTUs in bladder cancer and healthy** 84 **urine**

85 While there was no significant difference in microbiome composition in terms of overall  
86 diversity or composition at the phylum or family level, specific OTUs were identified that  
87 exhibited significant differences ( $p < 0.05$ ) in abundance between cancer and healthy samples  
88 (Fig. 4). Eight OTUs were enriched in urine of bladder cancer patients including genera  
89 *Fusobacterium*, *Actinobaculum*, *Facklamia*, *Campylobacter*. Three OTUs identified at strain  
90 level were *Campylobacter hominis*, *Actinobaculum massiliense*, and *Jonquetella antropi*  
91 (94otu40402). Five OTUs were enriched in healthy samples from the genera *Veillonella*,

92 *Streptococcus*, *Corynebacterium*; these OTUs were further identified as *Veillonella dispar* at  
93 species, and *Streptococcus cristatus*, *Corynebacterium appendicis* and *Corynebacterium sp.* at  
94 strain level.

## 95 Discussion

96 In this study, we have characterized urinary microbial communities of male patients  
 97 diagnosed with primary or recurrent bladder cancer and compared it with those of disease  
 98 free, age-matched controls. Although we did not observe major differences in overall  
 99 microbiome profiles, we identified several OTUs that were significantly over-represented in  
 100 bladder cancer or healthy subgroup. These differences suggest a possible role for urinary  
 101 microbiome in bladder cancer pathogenesis that merits further evaluation.

102 A reduction in microbial diversity in urine of bladder cancer patients was not detected in our  
 103 study (Fig. 1). While reduced diversity in the gut has been commonly linked with the state of  
 104 disease<sup>24</sup>, changes in microbiome diversity have not been consistently associated with urinary  
 105 tract disorders. Reduced bacterial diversity was observed in interstitial cystitis<sup>17</sup>, increased  
 106 diversity was found in urgency urinary incontinence<sup>15</sup> and chronic prostatitis<sup>21</sup>, while no  
 107 changes in microbial diversity could be associated with overactive<sup>12</sup> or neuropathic bladder  
 108 symptomatology<sup>18</sup>. It may be that the abundance of specific bacteria in urine is more  
 109 important than the total number of bacterial taxa present.

110 The most abundant phylum in both bladder cancer and healthy group was *Firmicutes*,  
 111 followed by *Actinobacteria*, *Bacteroidetes* and *Proteobacteria* (Fig. 2), which is in good  
 112 agreement with the composition of male urinary microbiome reported in current literature<sup>10,20</sup>.  
 113 Also, inter-individual variability, observed between microbiomes of the participants in our  
 114 study, has been repeatedly demonstrated in publications on urinary microbiome<sup>10,11,19,20</sup>,  
 115 which makes it challenging to define what constitutes a ‘core’ bladder microbiome.

116 Our comparison of bladder cancer versus healthy urine samples revealed bacterial taxa that  
 117 were overrepresented in one of the sample subgroups (Fig. 4). Of note, among those OTUs



that were more abundant in bladder cancer patients, an OTU belonging to genus *Fusobacterium* was detected. *Fusobacterium* is a common constituent of oral microbiome, but also an opportunistic pathogen with recognized carcinogenic potential<sup>25,26</sup>. It has been found associated with colorectal cancer in several studies<sup>27,28,29,30</sup>. Fusobacterial DNA was also detected in pancreatic<sup>31</sup>, breast<sup>32</sup>, esophageal<sup>33</sup> and laryngeal<sup>34</sup> cancer tissue, but this is to our knowledge, the first report on association of *Fusobacterium* with urothelial carcinomas. A proposed mechanism by which *Fusobacterium nucleatum* drives tumorigenesis involves activation of  $\beta$ -catenin cell signalling pathway leading to cell proliferation<sup>35,36</sup>. A study by Kostić *et al.*<sup>37</sup>, based on human sample analysis and mice model, suggests that, through recruitment of tumour-infiltrating immune cells, *Fusobacteria* generate a proinflammatory environment which supports tumour progression. There is also evidence that *F. nucleatum* inhibits NK cell cytotoxicity and T cell activity, thereby promoting immune evasion, which is one of the hallmarks of cancer<sup>38</sup>.

Enrichment of *F. nucleatum* in cancerous tissue seems to be mediated by binding of fusobacterial Fap2 lectin to tumour-displayed D-galactose- $\beta$ (1-3)-N-acetyl-D-galactosamine (Gal-GalNAc)<sup>39</sup>. A recently published pilot study demonstrated that in addition to colorectal carcinomas, various tumour types display Gal-GalNAc<sup>40</sup>. Although only moderate levels of Gal-GalNAc were found in urothelial carcinomas, the microbiome analysis undertaken in our study suggests that bladder cancer tissue can also be colonized by *F. nucleatum*.

An interesting observation on *F. nucleatum* is not to be overlooked: through action of its bacterial metabolites, *F. nucleatum* may be able to reactivate latent viral infections. In particular, *F. nucleatum* induced lytic replication of Kaposi's sarcoma-associated herpesvirus<sup>41</sup>, which we found was associated with bladder cancer in our previous study<sup>42</sup>.

This indicates a possible synergistic interplay of bacterial and viral pathogens in bladder cancer development.

The most prominent OTU enriched in bladder cancer urines in our study (Fig. 4) was identified as *Campylobacter hominis*. Studies have shown that *Campylobacter* species are potentially pathogenic as they are able to produce toxins, invade epithelial cells, and avoid host immune responses. Similarly, *Campylobacter* species were found over-represented together with *Fusobacterium* in colorectal cancer<sup>43</sup> and esophageal biopsies<sup>44</sup>.

Amongst other OTUs that were significantly more abundant in cancer patients, an OTU belonging to genera *Jonquetella* was detected. *Jonquetella* presence is potentially characteristic of urine microbiomes from individuals aged 70 and older<sup>10</sup>. Given the relatively small sample size, it is interesting that we could note clustering of samples according to age (Fig. 3), even though the study cohort already consisted of older individuals (Supplementary Table S1). These results confirm previous conclusion by Lewis et al. that aging modifies the composition of microbial communities in both the bladder and the gut<sup>10</sup>. Whether these shifts in microbiome composition that occur with aging increase cancer risks remains to be investigated.

Apart from being oncogenic, commensal microbiota may also provide beneficial, tumour-suppressive effects to the human host<sup>7</sup>. The concept that specific bacteria could protect against development of a malignant disease is particularly straightforward when considering urinary bladder cancer, because this is the only malignancy treated by a live microorganism, *Mycobacterium bovis* bacille Calmette-Guérin (BCG). Despite being used for more than 40 years, the molecular details of its therapeutic action are not fully elucidated. A proposed model suggests that BCG attaches to urothelial cells, which is followed by BCG

internalization by bladder cancer cells and initiation of immune responses that destroy cancerous tissue<sup>45</sup>.

It could be envisioned that similarly to BCG, certain commensal bacteria, residing naturally in the healthy bladder, could serve the function of tumour surveillance or act beneficially in a different manner. In this study, five OTUs were found to be increased in healthy bladder and they included *Streptococcus*, *Veillonella*, and *Corynebacterium* species. *Streptococcus*, and to a lesser extent *Veillonella*, have repeatedly been observed in urine of healthy men<sup>9,19,46</sup>. In addition, characterization of microbial populations in specimens of another urological malignancy, prostate cancer, also showed the statistically significant enrichment of *Streptococcus* in nontumorous tissue<sup>47</sup>. *Corynebacterium* might be a typical urine component in healthy men as opposed to *Lactobacillus* which is prevalent in women<sup>19</sup>.

Our study on bladder cancer microbiome had some limitations. We used clean-catch midstream urine to sample bladder microbiome, which has its limitations but from an ethical point of view is a far less invasive method than bladder tissue biopsy or catheterization.

This study included only male patients. Men are at considerably higher risk of developing bladder cancer, which may be explained by the effects of sex hormones or gender differences in metabolic detoxification of carcinogens<sup>48,49</sup>. It would be interesting to explore if any specific member in the female urinary microbiome, which is dominated by *Lactobacillus* species, provides a protective effect.

As with other studies comparing disease versus healthy microbiome, it is not possible to say whether the microbial alterations are the cause or the consequence of the disease. Further longitudinal studies with a larger sample number at different stages of tumorigenesis and

animal model studies will be needed to clarify the role of microbiome in bladder cancer formation and progression.

The main strength of the study is the novel insight on subtle changes of urinary microbiome in bladder cancer, including the increased abundance of possible pathogenic *Fusobacterium* species. Additionally, these results are important because the male urinary microbiome is often overlooked in urological studies, as the field is much more focused on female urogenital pathologies. More studies like this are needed to further define the core microbiome in both sexes and evaluate how it changes in specific disease states.

In conclusion, the 16S rDNA gene sequencing-based approach used in this work enabled us to characterize urinary bladder microbiome and detect differences in the relative abundance of specific bacteria in bladder cancer patients, with *Fusobacteria* as a possibly important representative. Whether observed differences contribute to bladder cancer development remains to be elucidated. A better understanding of the role of microbiome in bladder cancer could direct urologists to novel diagnostic and prognostic options, as well as to more personalized treatments and microbiome-targeted therapeutic interventions.

## Methods

### Subject recruitment and sample collection

The study began following approval from the Ethics Committee of the University Hospital in Split. Thirty six Caucasian men were recruited at the Department of Urology, University Hospital Split, between October 2015 and October 2016. The bladder cancer group contained 17 males diagnosed with primary or recurrent bladder cancer, and the control group had 19 healthy individuals who visited a urologist for prostate cancer screening check-up. None of the healthy controls had prostate cancer or indications for prostate biopsy (Supplementary Table S1). All experiments were performed in accordance with relevant guidelines and regulations and participants gave written informed consent for urine collection and analysis for research purposes. Exclusion criteria for both groups were antibiotic usage for at least one month prior to urine collection, positive history of sexually transmitted or recent urinary infections, diabetes and obesity. Additional exclusion criteria for bladder cancer patients were muscle-invasive disease, and previous treatment with Bacillus Calmette-Guérin (BCG) or radiotherapy. Tumour samples were evaluated by certified pathologist for malignancy grade and tumour stage. Clean catch, midstream urine was collected from all participants and stored at -80°C.

### DNA isolation from urine

Urine specimens (30 ml) were thawed and centrifuged at 7500 g, 4 °C for 10 minutes. The pellet was used for DNA extraction using PowerSoil<sup>®</sup> DNA Isolation Kit (MoBio Laboratories, Inc.), performed according to manufacturer's protocol. To avoid environmental contamination, all isolations from urine samples and from the reagent-only extraction control were carried out within a PCR hood. Isolated DNA samples were placed at -20 °C until PCR

amplification. DNA was quantified via the Qubit<sup>®</sup> Quant-iT dsDNA High Sensitivity Kit 7  
(Invitrogen, Life Technologies).

### **16S rRNA gene library preparation and MiSeq sequencing**

PCR amplification of 16S rDNA, sequencing and analyses were performed by Second  
Genome. 16S rRNA gene V4 region was amplified with 515F-806R fusion primers that  
incorporate Illumina adapters and indexing barcodes<sup>50</sup>. PCR products were quantified using  
Quant-iT<sup>™</sup> PicoGreen<sup>™</sup> dsDNA Assay Kit from Invitrogen (Life Technologies, Grand  
Island, NY), pooled in equal molar ratios, and sequenced for 2 x 250 cycles on the Illumina  
MiSeq platform (Illumina, San Diego, CA).

### **Bioinformatics and statistical analyses**

Sequenced paired-end reads were processed using USEARCH<sup>51</sup>. All sequences hitting a  
unique strain in an in-house strains database with an identity  $\geq 99\%$  were assigned a strain  
Operational Taxonomic Unit (OTU). The remaining non-strain sequences were quality  
filtered, dereplicated and then clustered at 97% by UPARSE<sup>52</sup>. Representative OTU  
sequences were assigned a taxonomic classification at 80% confidence cutoff via mothur's  
bayesian classifier<sup>53</sup>, against the Greengenes reference database of 16S rRNA gene  
sequences<sup>54</sup> clustered at 99% OTUs. A prevalence filter was used to remove spurious OTUs  
that were observed in less than 10% of the sample set.

Diversity within samples (alpha diversity) was evaluated as richness and Shannon diversity. Richness is the number of observed unique Operational Taxonomic Units (OTUs), and Shannon Index evaluates richness and the abundance of each OTU (evenness). Dissimilarity between samples (beta diversity) was assessed using the Bray-Curtis dissimilarity measure<sup>55</sup>. To visualize inter-sample relationships, Principal Coordinates Analysis (PCoA) was performed.

Differences in the overall microbial composition between bladder cancer and healthy samples were assessed by permutational analysis of variance, PERMANOVA<sup>56</sup>. To identify taxa that were significantly different between bladder cancer and healthy samples, we used DESeq2 package<sup>57</sup>, described for microbiome applications<sup>58</sup>. DESeq2 was run under default settings and q-values were calculated with the Benjamini-Hochberg procedure to correct p-values and control for false discovery rates.

## **Data Availability**

The datasets generated during the current study are available in the European Nucleotide Archive, accession number: PRJEB22327

## References

1. Sanli, O. *et al.* Bladder cancer. *Nat. Rev. Dis. Prim.* **3**, 17022 (2017).
2. Lloyd-Price, J., Abu-Ali, G. & Huttenhower, C. The healthy human microbiome. *Genome Med.* **8**, 51 (2016).
3. Garrett, W. S. Cancer and the microbiota. *Science* **348**, 80–86 (2015).
4. Martel, C. De *et al.* Global burden of cancers attributable to infections in 2008: a review and synthetic analysis. *Lancet* **379**, 1851 (2012).
5. Gagnaire, A., Nadel, B., Raoult, D., Neefjes, J. & Gorvel, J.-P. Collateral damage: insights into bacterial mechanisms that predispose host cells to cancer. *Nat. Rev. Microbiol.* **15**, 109–128 (2017).
6. Roy, S. & Trinchieri, G. Microbiota: a key orchestrator of cancer therapy. *Nat. Rev. Cancer* **17**, 271–285 (2017).
7. Zitvogel, L., Daillère, R., Roberti, M. P., Routy, B. & Kroemer, G. Anticancer effects of the microbiome and its products. *Nat. Rev. Microbiol.* **15**, 465–478 (2017).
8. Whiteside, S. A., Razvi, H., Dave, S., Reid, G. & Burton, J. P. The microbiome of the urinary tract - a role beyond infection. *Nat. Rev. Urol.* **12**, 81–90 (2015).
9. Aragón, I. M. *et al.* The urinary tract microbiome in health and disease. *Eur. Urol. Focus* doi:10.1016/j.euf.2016.11.001
10. Lewis, D. A. *et al.* The human urinary microbiome; bacterial DNA in voided urine of asymptomatic adults. *Front. Cell. Infect. Microbiol.* **3**, 41 (2013).
11. Liu, F. *et al.* Dysbiosis of urinary microbiota is positively correlated with type 2



- diabetes mellitus. *Oncotarget* **8**, 3798–3810 (2017).
12. Curtiss, N. *et al.* A case controlled study examining the bladder microbiome in women with overactive bladder (OAB) and healthy controls. *Eur. J. Obstet. Gynecol. Reprod. Biol.* **214**, 31–35 (2017).
13. Siddiqui, H. *et al.* Pathogens in urine from a female patient with overactive bladder syndrome detected by culture-independent high throughput sequencing: a case report. *Open Microbiol. J.* **8**, 148–53 (2014).
14. Thomas-White, K. J. *et al.* Evaluation of the urinary microbiota of women with uncomplicated stress urinary incontinence. *Am. J. Obstet. Gynecol.* **216**, 55.e1-55.e16 (2017).
15. Thomas-White, K. J. *et al.* Incontinence medication response relates to the female urinary microbiota. *Int. Urogynecol. J. Pelvic Floor Dysfunct.* **27**, 723–733 (2016).
16. Pearce, M. M. *et al.* The female urinary microbiome in urgency urinary incontinence. *Am. J. Obstet. Gynecol.* **213**, 347e1-347e11 (2015).
17. Siddiqui, H., Lagesen, K., Nederbragt, A. J., Jeansson, S. L. & Jakobsen, K. S. Alterations of microbiota in urine from women with interstitial cystitis. *BMC Microbiol.* **12**, 205 (2012).
18. Groah, S. L. *et al.* Redefining healthy urine: A cross-sectional exploratory metagenomic study of people with and without bladder dysfunction. *J. Urol.* **196**, 579–587 (2016).
19. Fouts, D. E. *et al.* Integrated next-generation sequencing of 16S rDNA and metaproteomics differentiate the healthy urine microbiome from asymptomatic bacteriuria in neuropathic bladder associated with spinal cord injury. *J. Transl. Med.*

- 10**, 174 (2012).
20. Nelson, D. E. *et al.* Characteristic male urine microbiomes associate with asymptomatic sexually transmitted infection. *PLoS One* **5**, e14116 (2010).
21. Shoskes, D. A. *et al.* The urinary microbiome differs significantly between patients with chronic prostatitis/chronic pelvic pain syndrome and controls as well as between patients with different clinical phenotypes. *Urology* **92**, 26–32 (2016).
22. Nickel, J. C. *et al.* Assessment of the lower urinary tract microbiota during symptom flare in women with urologic chronic pelvic pain syndrome: a MAPP network study. *J. Urol.* **195**, 356–362 (2016).
23. Xu, W. *et al.* Mini-review: perspective of the microbiome in the pathogenesis of urothelial carcinoma. *Am. J. Clin. Exp. Urol.* **2**, 57–61 (2014).
24. Mosca, A., Leclerc, M. & Hugot, J. P. Gut microbiota diversity and human diseases: Should we reintroduce key predators in our ecosystem? *Front. Microbiol.* **7**, 455 (2016).
25. Han, Y. W. *Fusobacterium nucleatum*: A commensal-turned pathogen. *Curr. Opin. Microbiol.* **23**, 141–147 (2015).
26. Gholizadeh, P., Eslami, H. & Kafil, H. S. Carcinogenesis mechanisms of *Fusobacterium nucleatum*. *Biomed. Pharmacother.* **89**, 918–925 (2017).
27. Castellarin, M. *et al.* *Fusobacterium nucleatum* infection is prevalent in human colorectal carcinoma. *Genome Res.* **22**, 299–306 (2012).
28. Kostic, A. D. *et al.* Genomic analysis identifies association of *Fusobacterium* with colorectal carcinoma. *Genome Res.* **22**, 292–298 (2012).

29. Flanagan, L. *et al.* *Fusobacterium nucleatum* associates with stages of colorectal neoplasia development, colorectal cancer and disease outcome. *Eur. J. Clin. Microbiol. Infect. Dis.* **33**, 1381–1390 (2014).
30. Bashir, A., Miskeen, A. Y., Bhat, A., Fazili, K. M. & Ganai, B. A. *Fusobacterium nucleatum*: an emerging bug in colorectal tumorigenesis. *Eur. J. Cancer Prev.* **24**, 373–85 (2015).
31. Mitsuhashi, K. *et al.* Association of *Fusobacterium* species in pancreatic cancer tissues with molecular features and prognosis. *Oncotarget* **6**, 7209–7220 (2015).
32. Hieken, T. J. *et al.* The microbiome of aseptically collected human breast tissue in benign and malignant disease. *Sci. Rep.* **6**, 30751 (2016).
33. Yamamura, K. *et al.* Human microbiome *Fusobacterium nucleatum* in esophageal cancer tissue is associated with prognosis. *Clin. Cancer Res.* **22**, 5574–5581 (2016).
34. Gong, H. *et al.* Alterations of microbiota structure in the larynx relevant to laryngeal carcinoma. *Sci. Rep.* **7**, 5507 (2017).
35. Rubinstein, M. R. *et al.* *Fusobacterium nucleatum* promotes colorectal carcinogenesis by modulating E-Cadherin/ $\beta$ -Catenin Signaling via its FadA adhesin. *Cell Host Microbe* **14**, 195–206 (2013).
36. Chen, Y. *et al.* Invasive *Fusobacterium nucleatum* activates beta-catenin signaling in colorectal cancer via a TLR4/P-PAK1 cascade. *Oncotarget* **8**, 31802–31814 (2017).
37. Kostic, A. D. *et al.* *Fusobacterium nucleatum* potentiates intestinal tumorigenesis and modulates the tumor-immune microenvironment. *Cell Host Microbe* **14**, 207–215 (2013).
38. Gur, C. *et al.* Binding of the Fap2 protein of *Fusobacterium nucleatum* to human

- inhibitory receptor TIGIT protects tumors from immune cell attack. *Immunity* **42**, 344–355 (2015).
39. Abed, J. *et al.* Fap2 mediates *Fusobacterium nucleatum* colorectal adenocarcinoma enrichment by binding to tumor-expressed Gal-GalNAc. *Cell Host Microbe* **20**, 215–225 (2016).
40. Abed, J. *et al.* Tumor targeting by *Fusobacterium nucleatum*: A pilot study and future perspectives. *Front. Cell. Infect. Microbiol.* **7**, 295 (2017).
41. Morris, T. L., Arnold, R. R. & Webster-Cyriaque, J. Signaling cascades triggered by bacterial metabolic end products during reactivation of Kaposi's sarcoma-associated herpesvirus. *J. Virol.* **81**, 6032–6042 (2007).
42. Paradžik, M. *et al.* Association of Kaposi's sarcoma-associated herpesvirus (KSHV) with bladder cancer in Croatian patients. *Tumor Biol.* **35**, 567–572 (2014).
43. Wu, N. *et al.* Dysbiosis signature of fecal microbiota in colorectal cancer patients. *Microb. Ecol.* **66**, 462–470 (2013).
44. Kaakoush, N. O., Castaño-Rodríguez, N., Man, S. M. & Mitchell, H. M. Is *Campylobacter* to esophageal adenocarcinoma as *Helicobacter* is to gastric adenocarcinoma? *Trends Microbiol.* **23**, 455–462 (2015).
45. Redelman-Sidi, G., Glickman, M. S. & Bochner, B. H. The mechanism of action of BCG therapy for bladder cancer: a current perspective. *Nat. Rev. Urol.* **11**, 153–62 (2014).
46. Dong, Q. *et al.* The microbial communities in male first catch urine are highly similar to those in paired urethral swab specimens. *PLoS One* **6**, (2011).
47. Cavarretta, I. *et al.* The microbiome of the prostate tumor microenvironment. *Eur.*

- Urol.* **72**, 625–631 (2017).
48. Dobruch, J. *et al.* Gender and bladder cancer: A collaborative review of etiology, biology, and outcomes. *Eur. Urol.* **69**, 300–310 (2016).
  49. Marks, P. *et al.* Female with bladder cancer: what and why is there a difference? *Transl. Androl. Urol.* **5**, 668–682 (2016).
  50. Caporaso, J. G. *et al.* Global patterns of 16S rRNA diversity at a depth of millions of sequences per sample. *Proc. Natl. Acad. Sci. U. S. A.* **108 Suppl**, 4516–4522 (2011).
  51. Edgar, R. C. Search and clustering orders of magnitude faster than BLAST. *Bioinformatics* **26**, 2460–2461 (2010).
  52. Edgar, R. C. UPARSE: highly accurate OTU sequences from microbial amplicon reads. *Nat. Methods* **10**, 996–998 (2013).
  53. Schloss, P. D. *et al.* Introducing mothur: Open-source, platform-independent, community-supported software for describing and comparing microbial communities. *Appl. Environ. Microbiol.* **75**, 7537–7541 (2009).
  54. McDonald, D. *et al.* An improved Greengenes taxonomy with explicit ranks for ecological and evolutionary analyses of bacteria and archaea. *ISME J.* **6**, 610–8 (2012).
  55. Bray, J. R. & Curtis, J. T. An ordination of the upland forest communities of southern Wisconsin. *Ecol. Monogr.* **27**, 325–349 (1957).
  56. Anderson, M. J. A new method for non parametric multivariate analysis of variance. *Austral Ecol.* **26**, 32–46 (2001).
  57. Love, M. I., Huber, W. & Anders, S. Moderated estimation of fold change and dispersion for RNA-seq data with DESeq2. *Genome Biol.* **15**, 550 (2014).

58. McMurdie, P. J. & Holmes, S. Waste not, want not: why rarefying microbiome data is inadmissible. *PLoS Comput. Biol.* **10**, (2014).

## **Acknowledgements**

This work was supported by Croatian Science Foundation Grant No: IP-2014-09-1904 to JT.

The authors thank to Ms. Sandra Vujević for technical assistance.

## **Author Contributions**

JT, VBP and MŠ designed the study, MŠ enrolled the participants and collected samples, VBP, CTC, LSC and BR collected the data, CTC and LSC analysed the sequencing data, VBP drafted the main manuscript text, CTC and LSC prepared the figures and all authors contributed to the final article.

## **Additional Information**

### **Competing Interests**

Authors declare no competing financial interests.

## Figure Legends

**Figure 1. Microbial alpha diversity of urine samples.** Bladder cancer patients (green circles); Healthy males (blue triangles): **(a)** Observed number of OTUs, **(b)** Shannon Index. Both alpha diversity metrics were statistically similar between cancer and healthy samples.

**Figure 2. Urinary microbiota of male bladder cancer patients and healthy controls.** Most abundant taxa are shown at phylum **(a)**, class **(b)**, order **(c)**, family **(d)** and genus **(e)** level.

**Figure 3. Microbial beta diversity.** Dimensional reduction of the Bray-Curtis distance between microbiome samples, using PCoA ordination method, for bladder cancer urines (dots) and healthy controls (triangles). Data points are coloured according to age in years. Permutational analysis of variance shows that variations in the urine microbiome were significantly associated with age ( $p = 0.008$ ). Samples do not cluster according to their cancer/healthy status.

**Figure 4. Differently abundant features between urine samples from bladder cancer patients and healthy controls.** Each point represents an OTU belonging to respective genus. 94otu4042 was identified as *Jonquetella anthropi*, while 94otu9391 and 94otu11945 belong to family *Ruminococcaceae*. Features were considered significant if their false discovery rate-corrected p-value was less than or equal to 0.05, and the absolute value of the log<sub>2</sub> fold change was greater than or equal to 1.

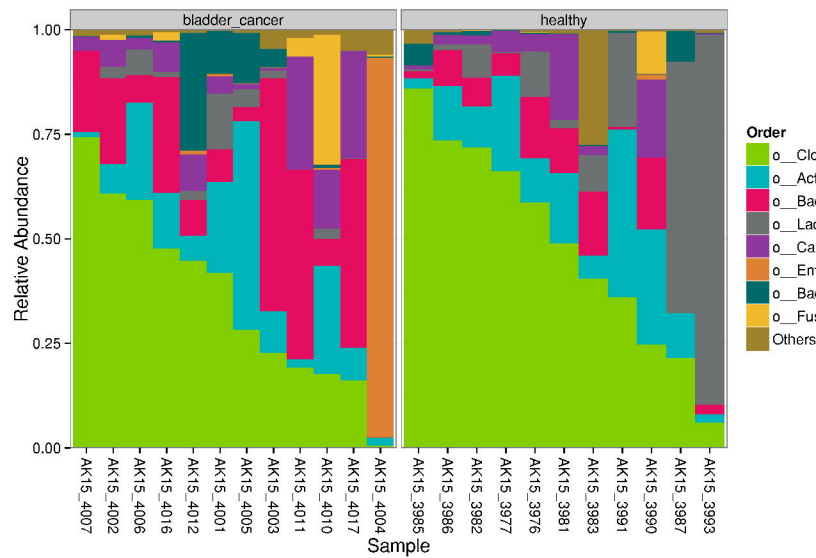



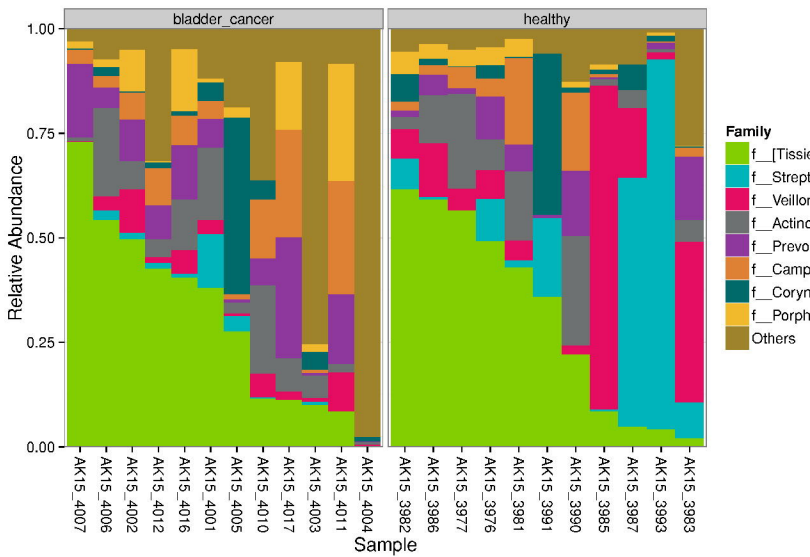

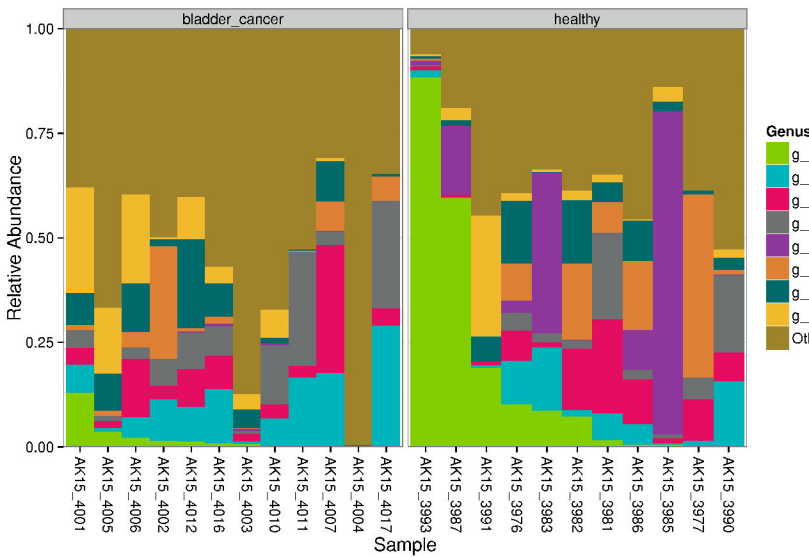

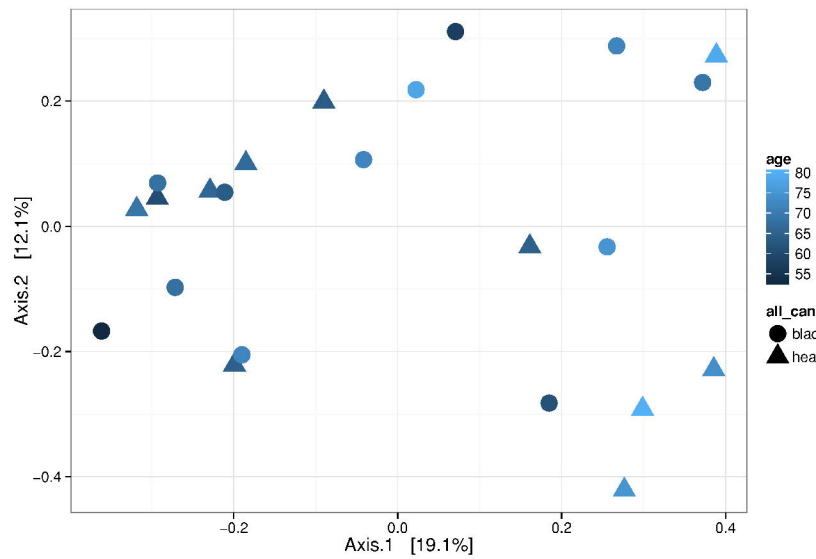

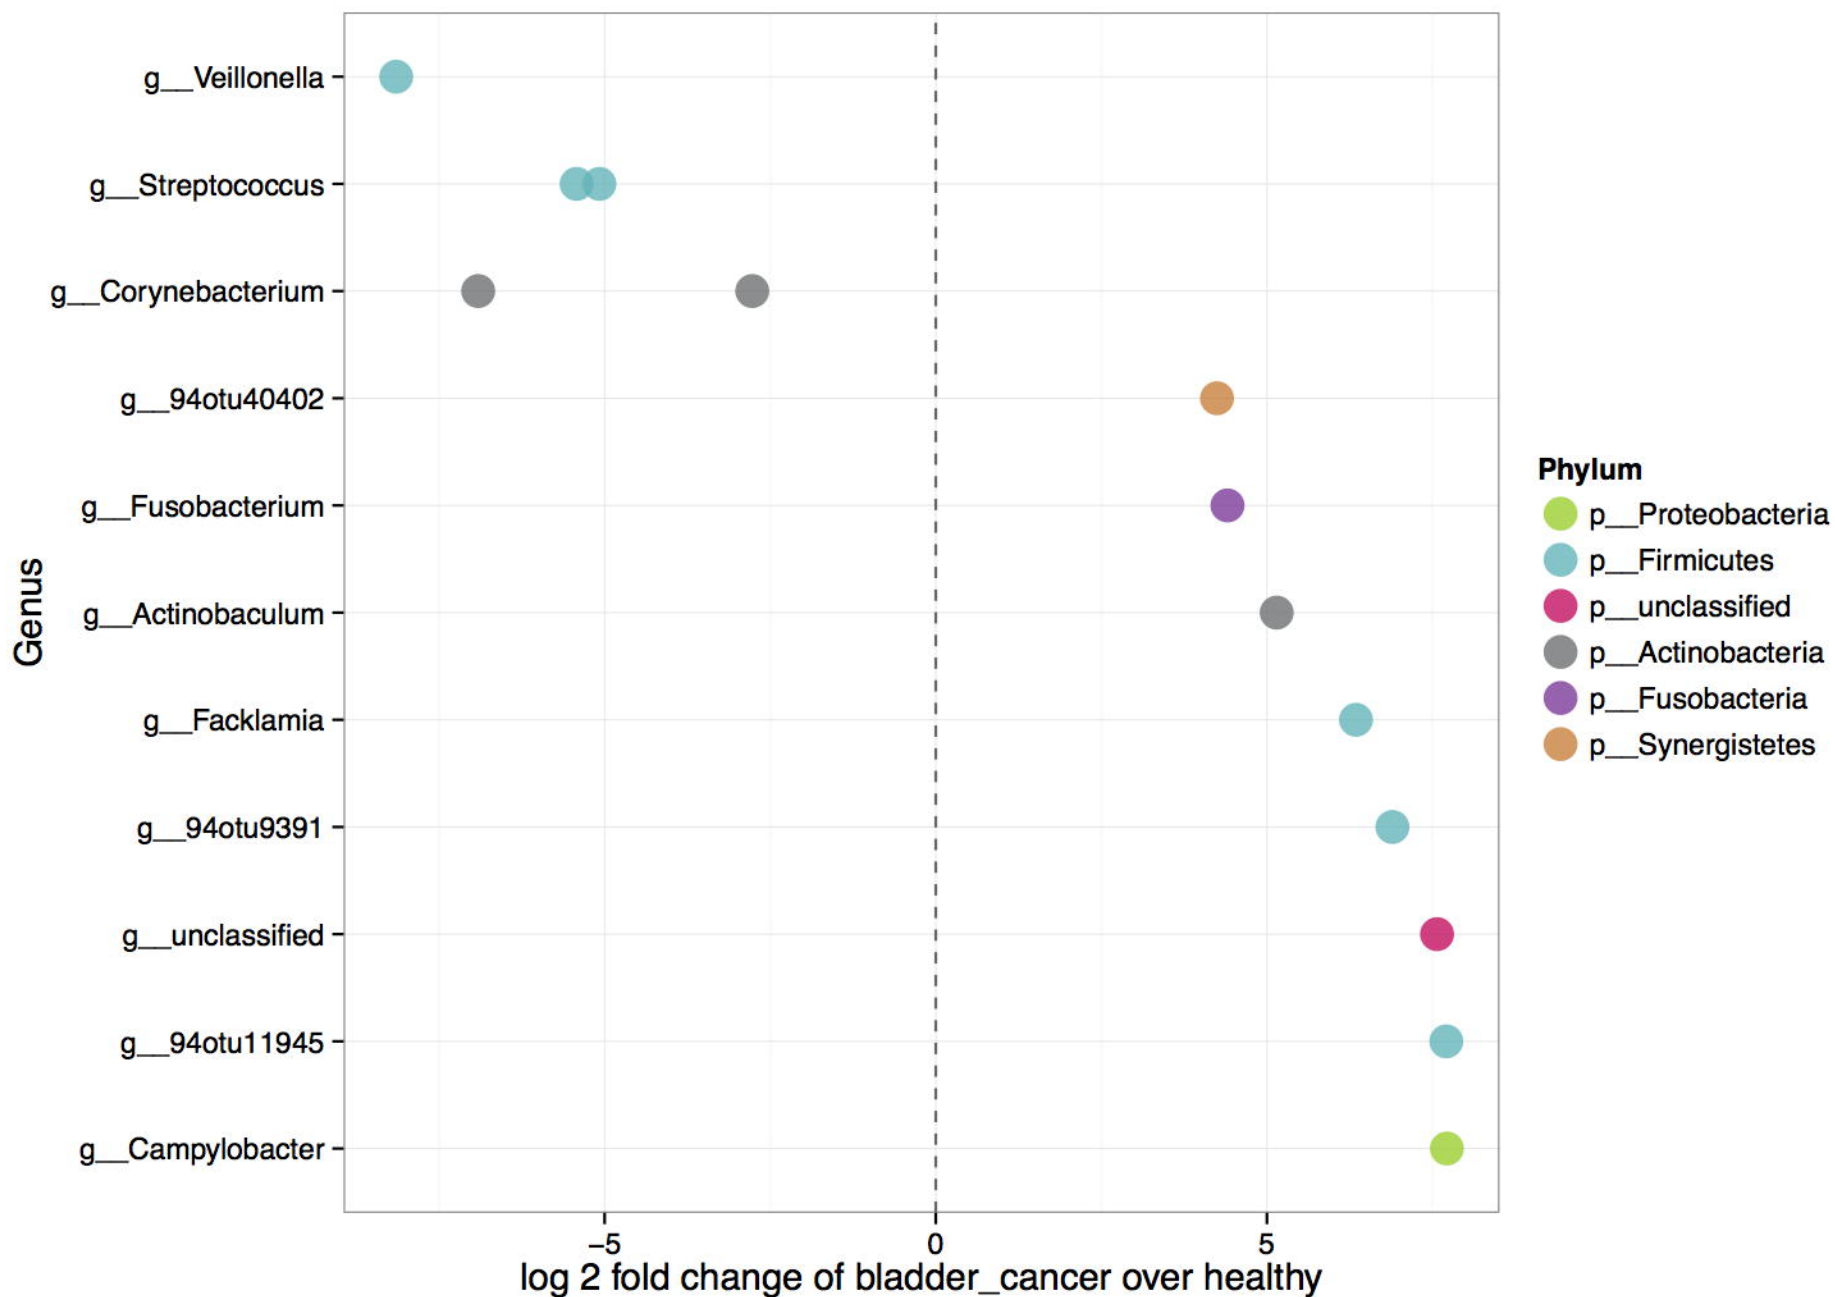

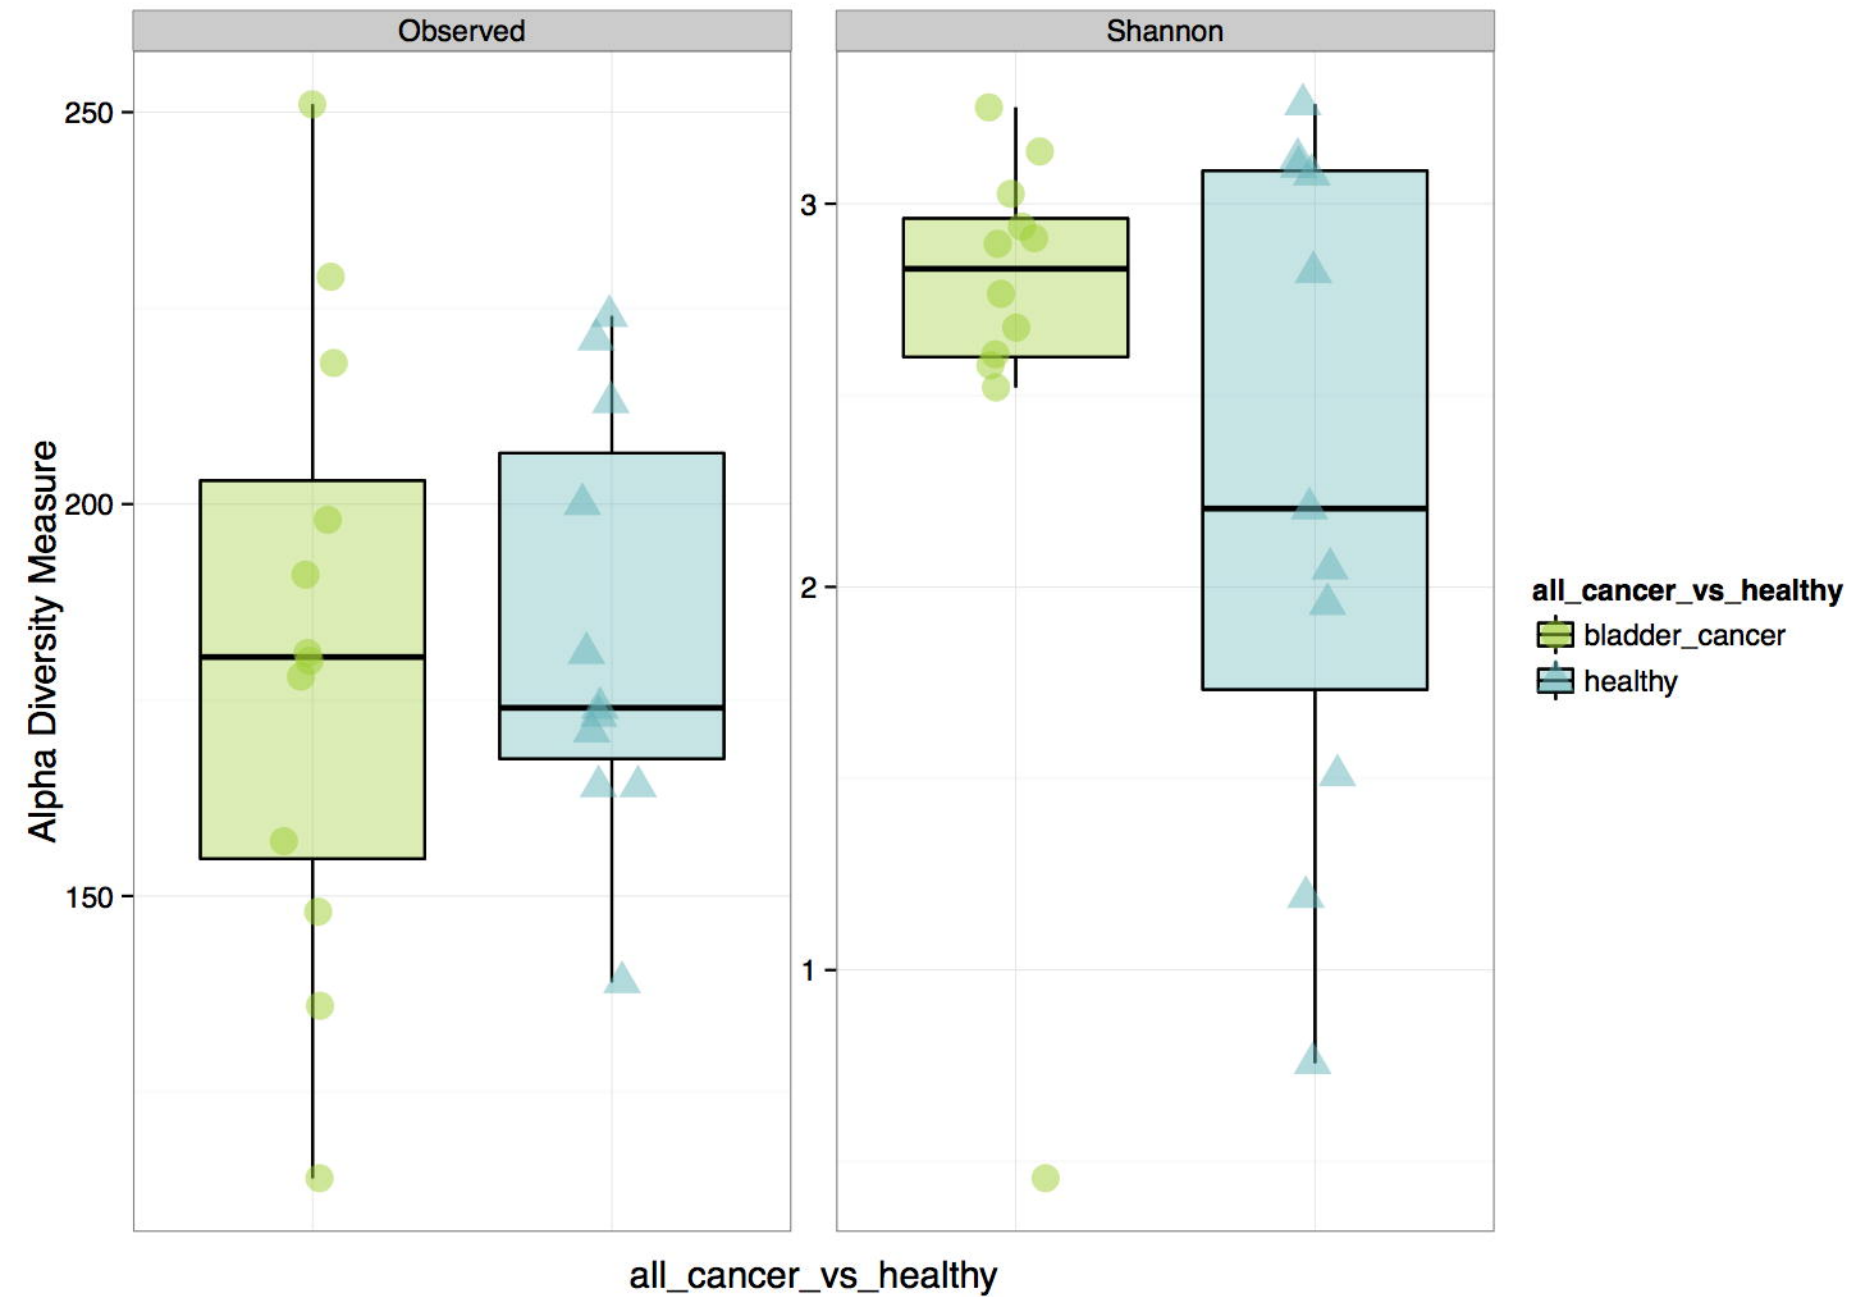

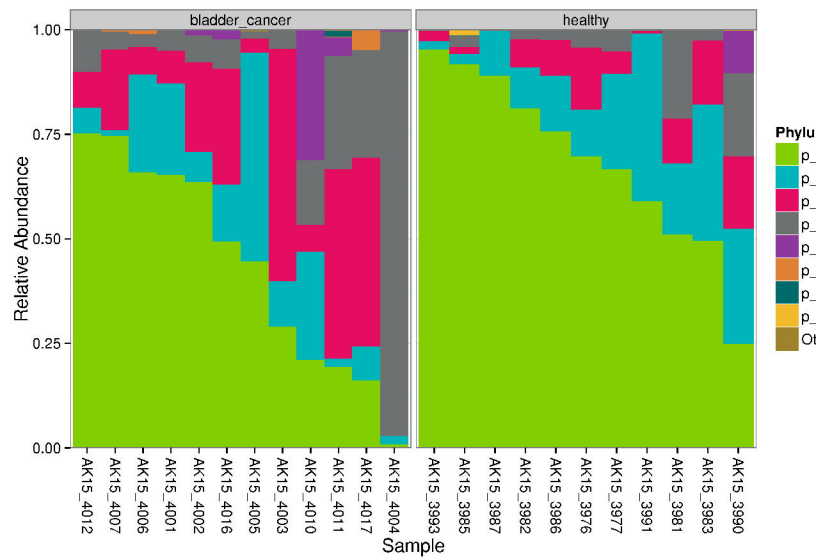

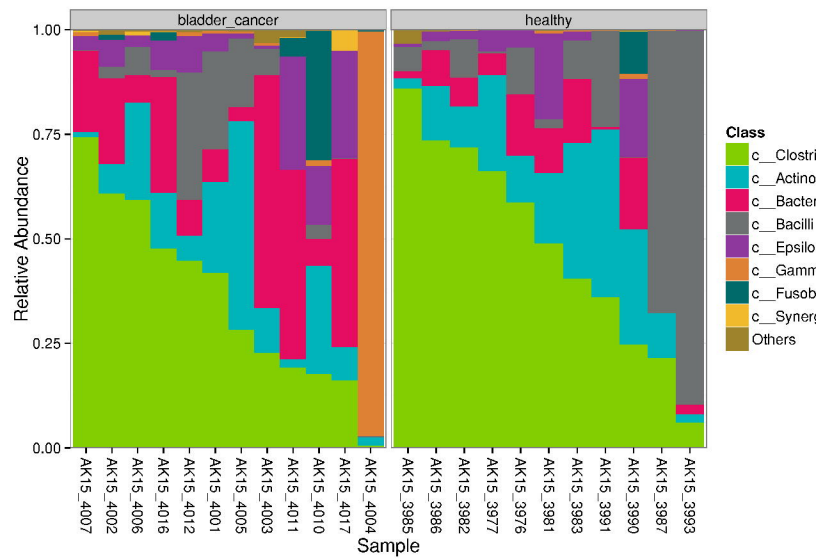

Source: http://biorxiv.org/content/10.1101/224667v1.full.pdf
